# Supplementary material for: Uptake of Tyrosine Amino Acid on Nano-Graphene Oxide
Source: MDPI journal article supplement (doi:10.3390/ma11010068), 2018-01-04
Supplement: s1 [file s1]

*Supplementary data*

# **Uptake of Tyrosine Amino Acid on Nano-Graphene Oxide**

**Hossam M. Nassef** <sup>1,2</sup>, **Mohamed Hagar** <sup>1,3</sup>, **Zeiad Malek** <sup>1</sup>, and **Abdelhameed M. Othman** <sup>1,4,\*</sup>

<sup>1</sup> Chemistry Department, Faculty of Science at Yanbu, Taibah University, Yanbu 46423, Saudi Arabia; hossamnassef2002@gmail.com (H.M.N.); mohamedhaggar@gmail.com (M.H.); waleed2993@gmail.com (Z.M)

<sup>2</sup> Chemistry Department, Faculty of Science, Damietta University, Damietta 34517, Egypt

<sup>3</sup> Chemistry Department, Faculty of Science, Alexandria University, Alexandria 23132, Egypt

<sup>4</sup> Environmental Biotechnology Department, Genetic Engineering and Biotechnology Research Institute, University of Sadat City, Sadat City 32897, Egypt

\* Correspondence: ayosefaly@taibahu.edu.sa; Tel.: +966-540-673-967

GO used in this study was purchased from Advanced Chemical Supplier (ACS) Material LLC. It has been fully characterized by the company [23] as mentioned below:

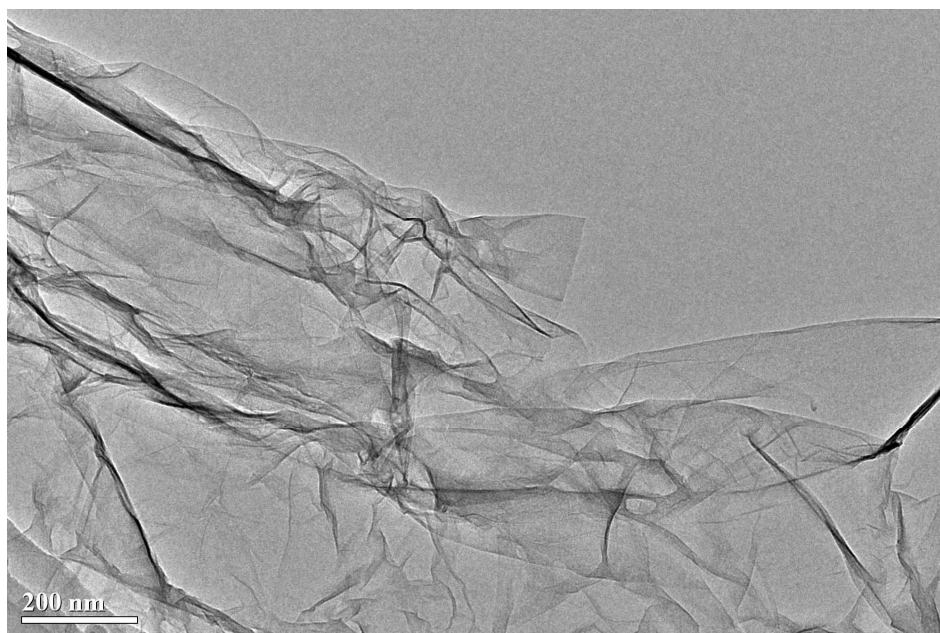

**Figure S1.** TEM Image of Single Layer Graphene (ACS Material-Graphene Factory)

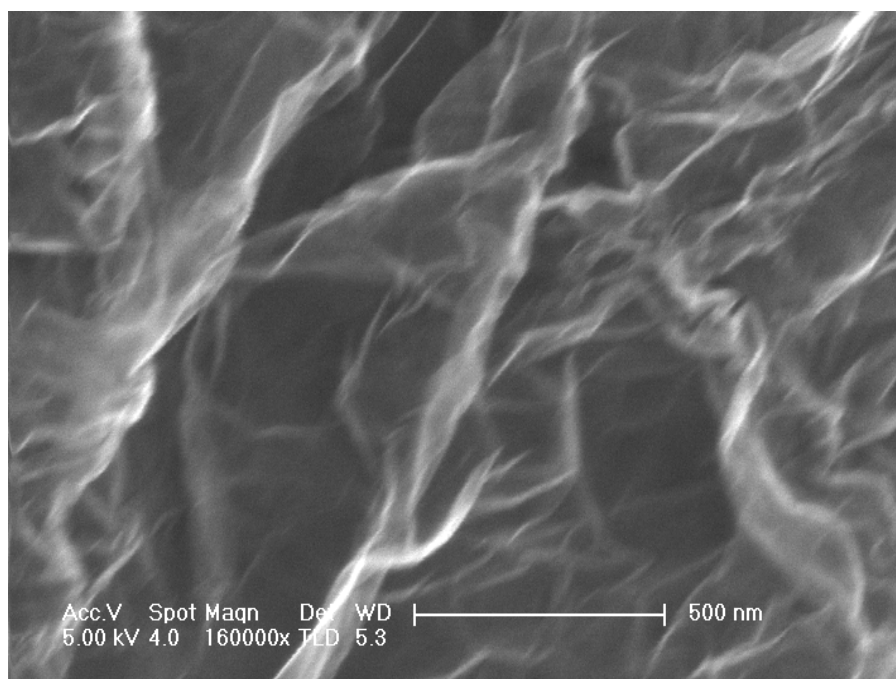

**Figure S2.** SEM Image of Single Layer Graphene (ACS Material-Graphene Factory)

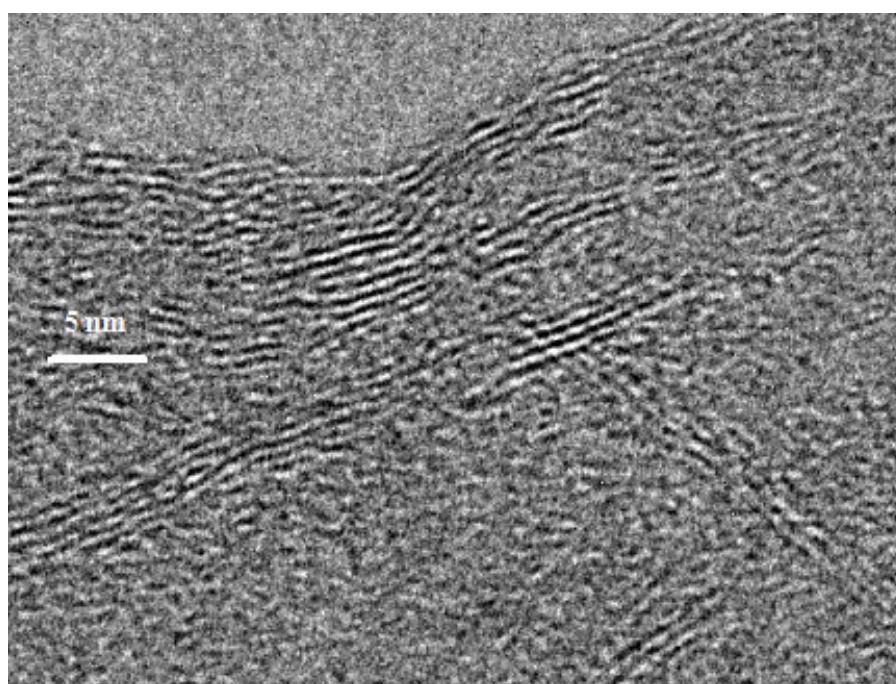

**Figure S3.** HRTEM Image of Single Layer Graphene (ACS Material-Graphene Factory)

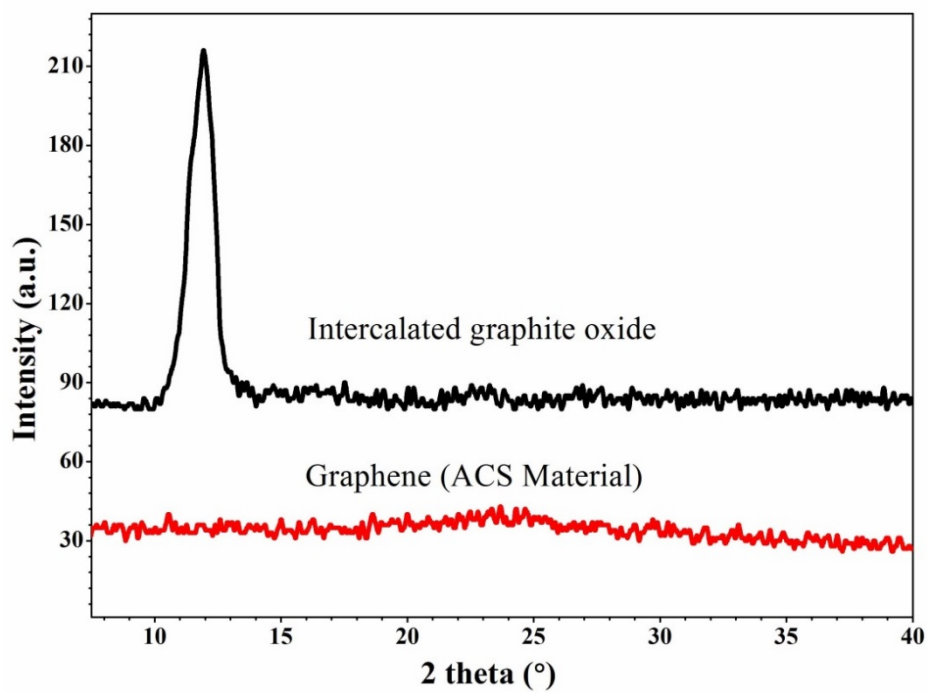

**Figure S4.** XRD Patterns of Single Layer Graphene (ACS Material-Graphene Factory)

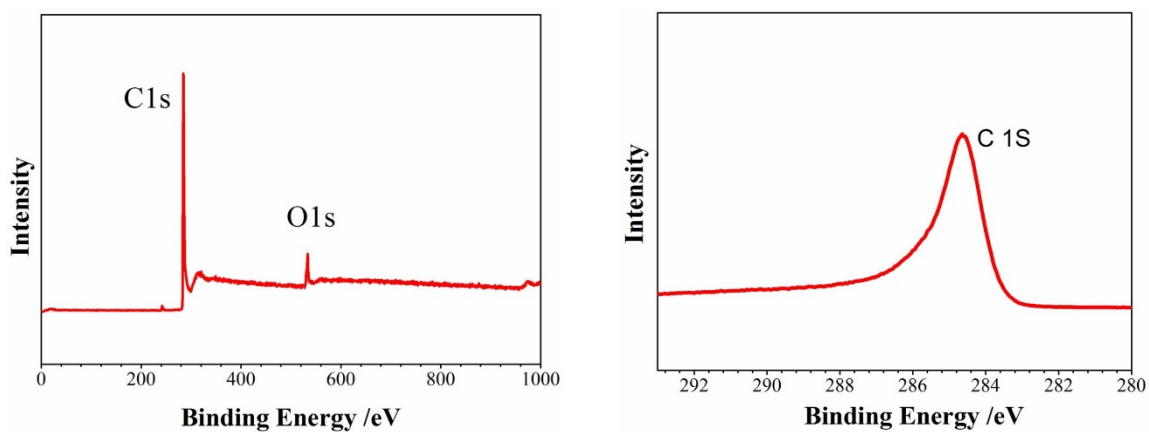

**Figure S5.** XPS Patterns of Single Layer Graphene. (ACS Material-Graphene Factory)

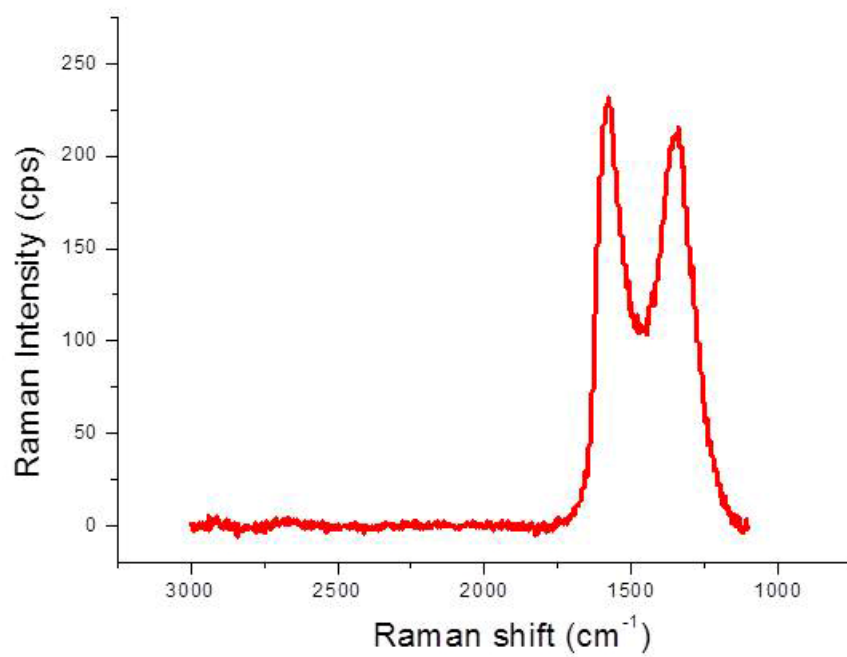

**Figure S6.** Raman Spectrum of Single Layer Graphene (ACS Material-Graphene Factory)
